# Supplementary material
Source: ML conference proceedings conference paper supplement (https://openaccess.thecvf.com/content/CVPR2026/html/Yang_Multi-Scale_Gradient-Guided_Unrolling_CVPR_2026_paper.html)
Supplement: Supplementary file 1 [file Yang_Multi-Scale_Gradient-Guided_Unrolling_CVPR_2026_supplemental.pdf]

# Supplementary Material for “Multi-Scale Gradient-Guided Unrolling Architecture with Adaptive Mamba for Compressive Sensing”

Le Yang, Hongping Gan\*

School of Software, Northwestern Polytechnical University, Xi’an, China

yangle001@mail.nwpu.edu.cn; ganhongping@nwpu.edu.cn

## 1. Overview

In this Supplementary Material, we provide more details and comparisons, including detailed experiments settings, performance under noise, more complexity analysis and ablation studies on learnable sampling matrix.

## 2. More Experiments

### 2.1. Experimental Settings

We utilize 400 images from the BSD400 dataset [1] as training data seeds. Through random horizontal and vertical flips followed by random cropping, we extract 102,400 patches of  $128 \times 128$  pixels from these 400 images to form our actual training dataset. The Set11 dataset [3] is employed as the validation set. For optimization, we utilize the AdamW optimizer [4] with an initial learning rate of  $1e-4$ , which is multiplied by 0.1 at epochs 30, 100, and 175 during the 200 training epochs, ultimately decreasing to  $1e-7$ .

In our experiments (excluding ablation studies), the implemented MambaCS consists of 8 reconstruction stages, manifesting as 4 feature scales in the U-shaped structure with 32, 64, 128, and 256 channels, respectively. The sampling convolution kernel size is set equal to the training patch size, and the training batch size is set to 16. MambaCS’s performance is evaluated on multiple public benchmark datasets including General100 [2], LIVE29 [6], OST300 [7], Set14 [8], and BSD68 [5], using Peak Signal-to-Noise Ratio (PSNR) and Structural Similarity Index Measure (SSIM) as evaluation metrics. We download the execution code of other CS methods from their respective websites and execute them with their default settings to obtain comparative results. Our method is implemented in Python using the PyTorch 2.1.1 framework. All experiments are conducted on an Intel Xeon Silver 4216 CPU and GeForce RTX 3090 GPU with 24 GB RAM.

\*Corresponding author

### 2.2. Performance under Noise

To evaluate the performance of MambaCS in noise-contaminated environments, we introduce various levels of Gaussian noise to images from the LIVE29 dataset. Subsequently, we perform reconstruction from these noise-corrupted images and conduct both quantitative comparisons and visual assessments against clean reference images. We employ Gaussian noise with four standard deviation levels:  $\delta \in \{0.001, 0.002, 0.004, 0.008\}$ .

Table 1. Comparison of PSNR (dB) and SSIM for different methods under varying Gaussian noise levels  $\delta \in \{0, 0.001, 0.002, 0.004, 0.008\}$  at CS rates  $\tau \in \{0.04, 0.10\}$ .

| noise | cs_ratio | TransCS |        | OCTUF |        | NesTD-Net |        | UFC-Net |        | CPP-Net |        | MambaCS |        |
|-------|----------|---------|--------|-------|--------|-----------|--------|---------|--------|---------|--------|---------|--------|
|       |          | PSNR    | SSIM   | PSNR  | SSIM   | PSNR      | SSIM   | PSNR    | SSIM   | PSNR    | SSIM   | PSNR    | SSIM   |
| 0     | 0.04     | 24.87   | 0.6942 | 25.26 | 0.7113 | 25.30     | 0.7140 | 24.98   | 0.6995 | 25.52   | 0.7211 | 25.94   | 0.7257 |
|       | 0.10     | 27.65   | 0.8195 | 28.23 | 0.8345 | 28.26     | 0.8373 | 27.88   | 0.8254 | 28.46   | 0.8386 | 28.93   | 0.8400 |
| 0.001 | 0.04     | 24.76   | 0.6840 | 25.12 | 0.7007 | 25.14     | 0.7021 | 24.85   | 0.6876 | 25.32   | 0.7068 | 25.69   | 0.7123 |
|       | 0.10     | 27.19   | 0.7878 | 27.61 | 0.7985 | 27.60     | 0.8000 | 27.28   | 0.7884 | 27.74   | 0.8032 | 28.04   | 0.8036 |
| 0.002 | 0.04     | 24.67   | 0.6747 | 25.00 | 0.6903 | 25.01     | 0.6911 | 24.73   | 0.6769 | 25.16   | 0.6945 | 25.49   | 0.7002 |
|       | 0.10     | 26.80   | 0.7600 | 27.14 | 0.7687 | 27.13     | 0.7689 | 26.83   | 0.7571 | 27.23   | 0.7703 | 27.44   | 0.7719 |
| 0.004 | 0.04     | 24.48   | 0.6579 | 24.78 | 0.6716 | 24.78     | 0.6711 | 24.52   | 0.6568 | 24.90   | 0.6726 | 25.16   | 0.6777 |
|       | 0.10     | 26.15   | 0.7134 | 26.43 | 0.7201 | 26.40     | 0.7191 | 26.10   | 0.7064 | 26.42   | 0.7165 | 26.56   | 0.7190 |
| 0.008 | 0.04     | 24.15   | 0.6288 | 24.40 | 0.6393 | 24.38     | 0.6373 | 24.16   | 0.6233 | 24.47   | 0.6366 | 24.65   | 0.6408 |
|       | 0.10     | 25.14   | 0.6416 | 25.37 | 0.6482 | 25.33     | 0.6463 | 25.02   | 0.6317 | 25.29   | 0.6395 | 25.36   | 0.6424 |

The performance of MambaCS is evaluated using average PSNR and SSIM metrics across different noise levels, alongside comparative results from other SOTA methods. As shown in Table 1, MambaCS outperforms other methods in both PSNR and SSIM metrics across all noise levels. Fig. 1 presents a visual comparison of reconstructed images between MambaCS and other methods. It is evident that MambaCS maintains stable and refined reconstruction quality even under higher noise levels.

### 2.3. More complexity analysis

Table 2 compares inference times, GPU memory usage and sampling time between MambaCS and mainstream DUNs at CS rate  $\tau = 0.10$ . Inference times are averaged from 100 runs on a single-channel  $256 \times 256$  image, while sampling times are averaged from 100 operations across 32 single-channel  $256 \times 256$  images. We also compare complexity and performance with ST-Net (a MambaCS variant built on

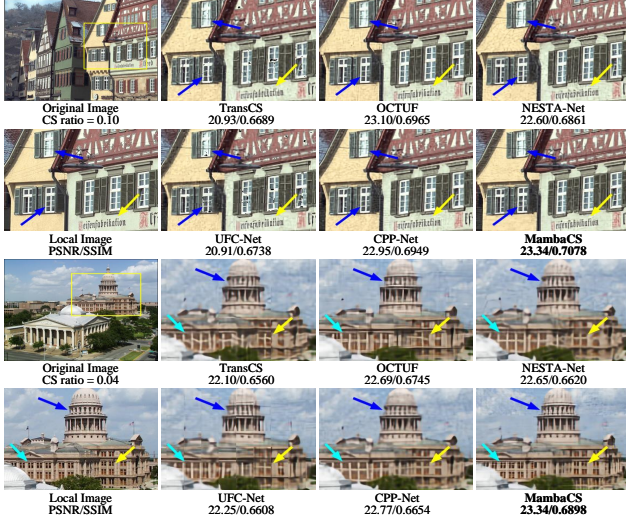

Figure 1. Visual comparisons of reconstructed image by MambaCS and other methods under Gaussian noise  $\delta = 0.008$  at CS rates  $\tau \in \{0.10, 0.04\}$ .

Swin Transformer) for comprehensive evaluation between models of similarly scaled.

Table 2. Complexity comparisons

| Method    | Params. (M) | FLOPs (G)    | Inference times (s) | Inference memory (MB) | Sample times (ms) | PSNR (dB)    |
|-----------|-------------|--------------|---------------------|-----------------------|-------------------|--------------|
| LTWIST    | 23.28       | 158.90       | 0.31346             | 552                   | 29.0850           | 27.42        |
| NesTD-Net | 5.36        | 372.58       | 0.23674             | 6140                  | 2.5257            | 27.73        |
| OCTUF     | 0.4         | 189.30       | 0.18746             | 1273                  | 54.6924           | 27.77        |
| CPP-Net   | 16.9        | 166.93       | 0.19615             | 2234                  | 87.7457           | 27.93        |
| ST-Net    | 45.86       | 90.15        | 0.56208             | 736                   | 9.4815            | 27.89        |
| MambaCS   | 44.91       | <b>87.74</b> | <b>0.16948</b>      | <b>546</b>            | 9.8591            | <b>28.43</b> |

## 2.4. Ablation Study on Learnable Sampling Matrix

For reference, we provide comparative experiments using a fixed Gaussian sampling matrix with  $\tau = 0.10$  on LIVE29 in Tab. 3. The results demonstrate that our MambaCS can achieve optimal performance even without using learnable sampling matrix.

Table 3. Comparison using fixed sampling matrix

| Method | LTWIST | NesTD-Net | OCTUF | UFC-Net | CPP-Net | MambaCS      |
|--------|--------|-----------|-------|---------|---------|--------------|
| PSNR   | 25.32  | 25.58     | 25.35 | 25.47   | 25.86   | <b>26.03</b> |

## References

[1] Pablo Arbeláez, Michael Maire, Charless Fowlkes, and Jitendra Malik. Contour detection and hierarchical image segmentation. *IEEE Transactions on Pattern Analysis and Machine Intelligence*, 33(5):898–916, 2010. 1

[2] Chao Dong, Chen Change Loy, and Xiaoou Tang. Accelerating the super-resolution convolutional neural network. In *European Conference on Computer Vision (ECCV)*, pages 391–407. Springer, 2016. 1

[3] Kuldeep Kulkarni, Suhas Lohit, Pavan Turaga, Ronan Kerivic, and Amit Ashok. Reconnet: Non-iterative reconstruction of images from compressively sensed measurements. In *Proceedings of the IEEE/CVF Conference on Computer Vision and Pattern Recognition*, pages 449–458, 2016. 1

[4] Ilya Loshchilov and Frank Hutter. Fixing weight decay regularization in adam. *arXiv:1711.05101*, 2017. 1

[5] David Martin, Charless Fowlkes, Doron Tal, and Jitendra Malik. A database of human segmented natural images and its application to evaluating segmentation algorithms and measuring ecological statistics. In *Proceedings of the IEEE/CVF International Conference on Computer Vision (ICCV)*, pages 416–423. IEEE, 2001. 1

[6] Hamid R Sheikh, Muhammad F Sabir, and Alan C Bovik. A statistical evaluation of recent full reference image quality assessment algorithms. *IEEE Transactions on Image Processing*, 15(11):3440–3451, 2006. 1

[7] Xintao Wang, Ke Yu, Chao Dong, and Chen Change Loy. Recovering realistic texture in image super-resolution by deep spatial feature transform. In *Proceedings of the IEEE/CVF Conference on Computer Vision and Pattern Recognition (CVPR)*, pages 606–615, 2018. 1

[8] Roman Zeyde, Michael Elad, and Matan Protter. On single image scale-up using sparse-representations. In *Curves and Surfaces*, pages 711–730. Springer, 2012. 1
